# Supplementary material
Source: PubMed Central journal article supplement (PMC4392937)
Supplement: supp_dc13-0327v130327_DC130327SupplementaryData.pdf [file supp_dc13-0327v130327_DC130327SupplementaryData.pdf]

## SUPPLEMENTARY DATA

### DEFEND-1 Trial Investigators

#### *Canada*

Aronson, Ronnie MD FRCPC FACE, LMC Diabetes & Endocrinology, Toronto, ON; Conway, James MD, Canadian Centre for Research on Diabetes, Smith Falls, ON; Dowell, Anthony MD, Dynamik Research Inc, Pointe Clare, QC; Rabasa-Lhoret, Remi MD PhD, CHUM Hotel-Dieu, Montreal, QC; Ross, Stuart MB ChB FRACP FRCPC, LMC Diabetes & Endocrinology, Calgary, AB; Twum-Barima, David MB ChB MSc FRCPC, LMC Diabetes & Endocrinology, Oakville, ON.

#### *Denmark*

Christiansen, Sandhal MD PhD, Århus Sygehus Medicinsk Eudokrinologisk Afdeling, Aarhus; Gram, Jeppe MD PhD, Department of Endocrinology Hospital of Southwest, Esbjerg.

#### *Finland*

Korsoff, Pirkko MD, Satakunnan Keskussairaala, Pori; Lahtela, Jorma MD PhD, University Hospital of Tampere, Tampere; Mattsson, Ove MD, Ålands Centralsjukhus, Mariehamn; Nuutila, Pirjo MD PhD, Turun yliopistollinen sairaala, Turku; Strand, Jorma MD, Oulun Diakonissalaitos, ODL, Oulu; Tulokas, Timo MD, Lapin keskussairaala, Rovaniemi; Vauhkonen, Ilkka MD PhD, Kuopio University Hospital, Kuopio.

#### *Germany*

Bornstein, Stefan MD PhD, Universitätsklinikum Carl Gustav, Dresden; Hamann, Andreas MD PhD, Diabetes-Klinik Bad Nauheim GmbH, Bad Nauheim; Humpert, Per MD PD, University of Heidelberg, Heidelberg; Maimer, Anna MD, Clinical Trial Center, Heidelberg; Jaeckel, Elmar MD, Hannover Medical School, Hannover; Nauck, Michael MD PhD, Diabeteszentrum Bad Lauterberg in Harz Fachklinik für Diabetes und Stoffwechselkrankheiten, Bad Lauterberg im Harz; Pfeiffer, Andreas MD PhD, Charite Klinikum Benjamin Franklin Abteilung für Endokrinologie, Diabetes und Ernährungsmedizin, Berlin; Schloot, Nanette MD, Deutsches Diabetes Zentrum Institut für Klinische Diabetologie, Düsseldorf; Seissler, Jochan MD, Medical Clinic Innenstadt University Hospital, Munich.

#### *Italy*

Baroni, Marco MD, AOU di CA Polo Monserrato Univ. di Cagliari - Dip di Scienze Mediche Internistiche Endocrinol e Diabetol - UO di Diabetologia, Monserrato; Bosi, Emanuele MD, IRCSS Fondazione San Raffaele Del Monte Tabor Di Milano, Milan; Buzzetti, Raffaella MD, Ospedale S. Maria Goretti Polo Pontino dell'Università La Sapienza di Roma, Latina; Cavallo, Maria MD PhD, Università La Sapienza di Roma, Rome; Ghirlanda, Giovanni MD, Università Cattolica del Sacro Cuore Policlinico A. Gemelli Istituto di Patologia Speciale Medica Day Hospital Diabetologico, Rome; Giordano, Carla MD, Azienda Ospedaliera Universitaria, Palermo; Giorgino, Francesco MD PhD, A.O. Ospedale Policlinico Consorziale di Bari U.O. Complessa di Endocrinologia, Bari; Guglielmi, Chiara MD, University Campus Bio-Medico, Rome; Leotta, Sergio MD, ASL Rm B Ospedale Sandro Pertini U.O.C. Dietologia, Diabetologia e Malattie Metaboliche, Rome; Pozzilli, Paolo MD PhD, Università Campus Bio-Medico di Roma, Rome; Tubili, Claudio MD, Azienda Ospedaliera San Camillo Forlanini, Rome.

#### *Spain*

Brito, Miguel MD, Endocrinology and Nutrition Department, Hospital Univesitario Puerta de Hierro, Majadahonda; Anglada, Jordi MD PhD, Hospital Mutua de Terrassa Servei Endocrinologia, Terrassa; Calle, Alfonso MD PhD, Endocrinology Service Hospital Clinico San Carlos Plaza de Cristo Rey s/n, Madrid; Dominguez, José MD, Hospital Universitario Sant Juan Servicio Endocrinología, Alicante; Fernandez-Catalina, Pablo MD PhD, Complejo Hospitalario de Pontevedra Hospital Montecelo, Pontevedra; Hernandez, Antonio MD, Hopsital Universatrio Dr Peset Endocrinology Section, Valencia; Hernandez, Cristina MD, Hospital Vall Hebrón Servei Endocrinologia, Barcelona; Masmiquel, Luis MD PhD, Hospital Son Llätzer Endocrinology Department, Palma de Mallorca; Ricart, Wilfredo MD, Hospital

## SUPPLEMENTARY DATA

Dr. Josep Trueta Unit of Diabetes, Endocrinology and Nutrition, Girona; Rovira, Adela MD PhD, Fundaci3n Jim3nez-D3az Policl3nica de Endocrino, Madrid.

### *Sweden*

Brismar, Kerstin MD PhD, Kliniken f3r Endokrinologi, Metabolism och Diabetes, D2:04 Karolinska Universitetssjukhuset, Stockholm; De Laval, Dorota MD, Diabetes Care Unit, Dept of Internal Medicine Blekingesjukhuset, County Hospital, Karlskrona; Eliasson, Bjorn MD PhD, Lundberg Laboratorium for Diabetic Research/SU, Gothenburg; Fors, Peter MD, Diabetes Care Unit Alingsås Hospital, Alingsås; Gunther, Marion MD, Medicine Outpatients Department/Diabetes, Skövde; Jendle, Johan MD PhD, Endokrin och Diabetescentrum, Medicinkliniken Centralsjukhuset Karlstad, Karlstad; Kempe, Anders MD, Öbackakliniken Härnösands Sjukhus, HÄRNÖSAND; Lager, Ibe MD PhD, Forskningsenheten Centralsjukhuset I Kristianstad Gula byggnaden, Kristianstad; Lindmark, Stina MD PhD, Metabolenheten, Medicinkliniken Norrlands Universitetssjukhus, Umeå; Mathiesen, Ulrik MD, County Hospital of Oskarshamn, Oskarshamn; Rosenqvist, Ulf MD, Medicinska specialistkliniken NSV Lasarettet Motala, Motala; Saaf, Jan MD, Köping Hospital, Köping; Sartor, Gunnar MD PhD, Medicinmottagningen Länssjukhuset, Halmstad; Sjöberg, Jan Stefan MD PhD, Medicinmottagningen Länssjukhuset, Halmstad; Thunander, Maria MD PhD, Diabetesmottagningen Medicinkliniken Landstinget Kronoberg Länssjukvården Central Hospital, Växjö.

### *UK*

Andrews, Robert MRCP, MBChB, PhD, Bristol Royal Infirmary, Bristol; Atkin, Stephen BSc MBBS MRCP PhD FRCP, Michael White Diabetes Centre Hull Royal Infirmary, Hull; Bellary, Srikanth MBBS MD MRCP (UK), Department of Research and Innovation, MIDRU Heart of England NHS Trust Bordsley Green East, Birmingham; Evans, Mark BSc MBBS MRCP MD FRCP, Department of Medicine Institute of Metabolic Science University of Cambridge, Cambridge; Gnudi, Luigi PhD FRCP FASN, Guy's Hospital, London; Jaap, Alan BSc MBChB MRCP MD FRCP, Royal Infirmary of Edinburgh, Edinburgh; Leech, Nicky MBChB MD FRC, Newcastle Clinical Research Facility Level 6, Leazes Wing, Royal Victoria Infirmary, Newcastle; MacRury, Sandra MBChB FRCP MB, Raigmore Hospital, Inverness; Ramtoola, Shenaz BSc MBChB MRCP (UK) MD FRCP, Royal Blackburn Hospital, Blackpool; Robinson, Anthony BSc MB.Ch MRCP FRCP DM, Royal United Hospital Bath NHS Trust, Bath.

### *USA*

Akright, Laura MD, Northeast Clinical Research of San Antonio, LLC, Schertz, TX; Anderson, Alyn MD, Clinical Innovations, Inc, Costa Mesa, CA; Aronoff, Stephen MD, Research Institute of Dallas, Dallas, TX; Asnani, Sunil MD, Meridian Medical Associates, Neptune, NJ; Balasubramanyam, Ashok MD, Baylor College of Medicine, Houston, TX; Bergstrom, Richard MD, Portland Diabetes & Endocrinology Center, Portland, OR; Bode, Bruce MD, Atlanta Diabetes Associates, Atlanta, GA; Bourne, Kimberley MD, FACE, KnG LLC dba Orlando Diabetes and Endocrine Specialists, Orlando, FL; Brown, Morris MD, Laureate Clinical Research Group, Atlanta, GA; Christensen, Richard MD, Humphreys Diabetes Center, Boise, ID; Christiansen, Mark MD, Diablo Clinical Research, Inc, Walnut Creek, CA; Constant, Robert MD, Diabetes and Endocrine Center of Orlando, Orlando, FL; Dandona, Paresh MD, Millard Filmore Hospital, Buffalo, NY; Daniels, Mark MD, Children's Hospital of Orange County, Orange, CA; Denham, Douglas DO, dgd Research, Inc, San Antonio, TX; Kipnes, Mark MD, dgd Research, Inc, San Antonio, TX; Desai, Gautam DO, Kentucky City University of Medicine and Biosciences, Kansas City, MO; Donner, Thomas MD, Johns Hopkins University School of Medicine, Baltimore, MD; Brown, Todd MD, Johns Hopkins University School of Medicine, Baltimore, MD; Dostou, Jean Marie MD, UNC Diabetes Care Center, Durham, NC; Fogelfeld, Leon MD, John H Stroger, Jr, Hospital of Cook County, Dept of Medicine, Division of Endocrinology, Chicago, IL; Fuentes, Ernesto MD, Elite Research Institute, Miami, FL; Furman, Geoffrey MD, Clinical Innovations, Inc, Santa Ana, CA; Gardner, Michael MD, University of Missouri Health Care, Columbia, MO; Gardner, David MD, University of Missouri Health Care, Columbia, MO; Gandhi, Ramesh MD, Dayton Science Institute, Dayton, OH; Navayogarajah, Shahila MD, Dayton Science Institute, Dayton, OH; Goland, Robin MD, Naomi Berrie

## SUPPLEMENTARY DATA

Diabetes Center/Columbia University, New York, NY; Gottlieb, Peter MD, Barbara Davis Center for Childhood Diabetes, University of Colorado Health Sciences Center, Aurora, CO; Gupta, Ramesh MD, Memphis, TN; Henriquez, Fidel MD, Clinical Trials Management, LLC, Pembroke Pines, FL; Horenstein, Richard MD, University of Maryland School of Medicine, Baltimore, MD; Donner, Thomas MD, University of Maryland School of Medicine, Baltimore, MD; Huffman, David MD, University Diabetes & Endocrine Consultants, Chattanooga, TN; Hussain, Iftikhar MD, Vital Prospects Clinical Research Institute, Tulsa, OK; Ipp, Eli MD, Los Angeles Biomedical Research Institute at Harbor UCLA Medical Center, Torrance, CA; Khairi, Rashid MD, Centurion Clinical Research, Indianapolis, IN; Liljenquist, David MD, Rocky Mountain Diabetes & Osteoporosis Center, Idaho Falls, ID; Madu, Ivy Joan MD, Diabetes Associates Medical Group, Orange, CA; May, Michael PhD MD, Vanderbilt Diabetes Center, Nashville, TN; McGill, Janet MD, Washington University, St. Louis, MO; Mordes, John MD, UMass Medical School, Worcester, MA; Nair, K.V. Ganesh MD, Little Rock Diagnostic Clinic, Little Rock, AR; Osei, Kwame MD, The Ohio State University, Division of Endocrinology, Diabetes and Metabolism, Columbus, OH; Ovalle, Fernando MD, University of Alabama at Birmingham, Birmingham, AL; Owen, Stanford MD, Gulfside Clinical Research, LLC, Gulfport, MS; Penabad, Jesus MD, Advanced Research Institute, Inc, Trinity, FL; Pepper, Gary MD, Jupiter, FL; Philipson, Louis MD PhD, University of Chicago Hospitals, Chicago, IL; Raskin, Philip MD, University of Texas, Southwestern Medical Center at Dallas, Dallas, TX; Rendell, Marc MD, Creighton Diabetes Center, Omaha, NE; Rennick, Ronald MD, Clinical Trials of America, Inc, Eugene, OR; Repas, Thomas DO FACP, CDE, Regional Medical Clinic-Endocrinology, Rapid City, SD; Repaske, David MD, Nationwide Children's Hospital, Columbus, OH; Roberts, Victor MD, Endocrine Clinical Research, Winter Park, FL; Romney, Craig MD, Liberty Research Center, Tacoma, WA; Ruckle, Jon MD, Hawaii Clinical Research Center, Honolulu, HI; Ibrahim, Saied MD, Clinical Innovations, Inc, Riverside, CA; Bolivar, Samuel MD, Clinical Innovations, Inc, Riverside, CA; Schorr, Alan DO, St. Mary Medical Center, Langhorne, PA; Seyoum, Berhane MD, University Health Center-4H, Detroit, MI; Shapiro, Lawrence MD, Winthrop University Hospital, Mineola, NY; Sievert, Rubens MD, Winthrop University Hospital, Mineola, NY; Elias, Siraj MD, Temple University, Philadelphia, PA; Soule, Jeremy MD, Medical University of South Carolina, Charleston, SC; Strzinek, Robert PhD DO, Protenium Clinical Research, LLC, Hurst, TX; Suarez, Manuel MD, Advanced Pharma CR, LLC, Miami, FL; Ellis, Kimberly DO, Advanced Pharma CR, LLC, Miami, FL; Weiner, Gilbert DO, Advanced Pharma CR, LLC, Miami, FL; Vega, Ramses MD, Advanced Pharma CR, LLC, Miami, FL; Hernandez, Francisco MD, Advanced Pharma CR, LLC, Miami, FL; Thompson, Michael MD, George Washington University, Washington, DC; Simon, Gary MD, George Washington University, Washington, DC; Valitutto, Michael DO, Borgess Research Institute, Kalamazoo, MI; Vinik, Bryan MD, East Coast Medical Associates, Boca Raton, FL; Wahlen, Jack MD PhD FACE, Endocrine Research Specialists, Ogden, UT; Weiss, Daniel MD, Your Diabetes Endocrine Nutrition Group, Inc, Mentor, OH; Wittlin, Steven MD, University of Rochester Medical Center, Rochester, NY; Wynne, Alan MD, Cotton-O'Neil Clinical Research Center, Topeka, KS; Zeidler, Adina MD FACE, University of Southern California Keck School of Medicine, Los Angeles, CA.

SUPPLEMENTARY DATA

**Supplementary Table 1.** Pre-specified subgroup analyses of change from baseline in C-peptide AUC at Month 12 (ITT population)

| Subgroup                      | Treatment comparison |                |              |               |                                  |         |
|-------------------------------|----------------------|----------------|--------------|---------------|----------------------------------|---------|
|                               | Placebo              |                | Otelixizumab |               | Difference                       | p-value |
|                               | n                    | Estimate (SE)* | n            | Estimate (SE) | Estimate (95% CI)                |         |
| <b>Age</b>                    |                      |                |              |               |                                  |         |
| Adolescent                    |                      | -0.35 (0.096)  |              | -0.30 (0.071) | 0.05 (-0.18, 0.28)               | 0.662   |
| Adult                         |                      | -0.21 (0.032)  |              | -0.20 (0.023) | 0.01 (-0.07, 0.09)               | 0.801   |
| <b>Continent</b>              |                      |                |              |               |                                  |         |
| North America                 |                      | -0.25 (0.036)  |              | -0.22 (0.026) | 0.03 (-0.05, 0.12)               | 0.439   |
| Europe                        |                      | -0.19 (0.050)  |              | -0.20 (0.035) | -0.01 (-0.13, 0.11)              | 0.892   |
| <b>Baseline C-peptide AUC</b> |                      |                |              |               |                                  |         |
| Low                           |                      | -0.03 (0.052)  |              | -0.08 (0.039) | -0.04 (-0.17, 0.09) <sup>†</sup> | 0.525   |
| Medium                        |                      | -0.22 (0.050)  |              | -0.14 (0.035) | 0.08 (-0.04, 0.20) <sup>†</sup>  | 0.185   |
| High                          |                      | -0.39 (0.054)  |              | -0.41 (0.038) | -0.02 (-0.15, 0.11) <sup>†</sup> | 0.732   |
| <b>Baseline insulin use</b>   |                      |                |              |               |                                  |         |
| Low                           |                      | -0.23 (0.054)  |              | -0.24 (0.036) | -0.00 (-0.13, 0.12)              | 0.939   |
| Medium                        |                      | -0.26 (0.049)  |              | -0.24 (0.037) | 0.02 (-0.10, 0.14)               | 0.788   |
| High                          |                      | -0.14 (0.054)  |              | -0.12 (0.037) | 0.02 (-0.11, 0.14)               | 0.780   |
| <b>Baseline HbA1c</b>         |                      |                |              |               |                                  |         |
| Low                           |                      | -0.26 (0.045)  |              | -0.19 (0.032) | 0.07 (-0.04, 0.18) <sup>†</sup>  | 0.196   |
| Medium                        |                      | -0.23 (0.053)  |              | -0.20 (0.035) | 0.03 (-0.09, 0.16) <sup>†</sup>  | 0.627   |
| High                          |                      | -0.15 (0.059)  |              | -0.24 (0.045) | -0.09 (-0.23, 0.06) <sup>†</sup> | 0.241   |
| <b>Baseline BMI</b>           |                      |                |              |               |                                  |         |
| Low                           |                      | -0.25 (0.054)  |              | -0.22 (0.037) | 0.04 (-0.09, 0.16)               | 0.586   |
| Medium                        |                      | -0.24 (0.047)  |              | -0.16 (0.037) | 0.08 (-0.04, 0.20)               | 0.177   |
| High                          |                      | -0.18 (0.053)  |              | -0.23 (0.037) | -0.06 (-0.18, 0.07)              | 0.363   |
| <b>Gender</b>                 |                      |                |              |               |                                  |         |
| Male                          |                      | -0.16 (0.036)  |              | -0.18 (0.026) | -0.02 (-0.11, 0.06)              | 0.616   |
| Female                        |                      | -0.34 (0.049)  |              | -0.24 (0.035) | 0.10 (-0.02, 0.22)               | 0.103   |
| <b>Anti-GAD status</b>        |                      |                |              |               |                                  |         |
| Negative                      |                      | -0.15 (0.104)  |              | -0.09 (0.072) | 0.06 (-0.19, 0.31)               | 0.642   |
| Positive                      |                      | -0.23 (0.031)  |              | -0.21 (0.022) | 0.02 (-0.06, 0.09)               | 0.687   |
| <b>Anti-IA2 status</b>        |                      |                |              |               |                                  |         |
| Negative                      |                      | -0.19 (0.060)  |              | -0.17 (0.036) | 0.02 (-0.12, 0.16) <sup>†</sup>  | 0.774   |
| Positive                      |                      | -0.23 (0.034)  |              | -0.22 (0.026) | 0.01 (-0.07, 0.10) <sup>†</sup>  | 0.752   |

SUPPLEMENTARY DATA

|                                                |  |               |  |               |                    |       |
|------------------------------------------------|--|---------------|--|---------------|--------------------|-------|
| <b>Number of positive autoantibody results</b> |  |               |  |               |                    |       |
| <b>One (GAD or IA-2)</b>                       |  | -0.21 (0.060) |  | -0.19 (0.032) | 0.02 (-0.11, 0.16) | 0.742 |
| <b>Two (GAD and IA-2)</b>                      |  | -0.23 (0.034) |  | -0.22 (0.027) | 0.01 (-0.08, 0.09) | 0.826 |

\*nmol/L; †Estimated treatment group difference within a subgroup, adjusted for age, region and baseline C-peptide AUC. AUC = area under the curve; BMI = body mass index; CI = confidence interval, not adjusted for multiple comparisons; GAD = glutamic acid decarboxylase; IA = insulin antibody.

**Supplementary Table 2.** Secondary efficacy parameters at Month 12 (ITT population)

| Parameter                                                 | Observed mean     |               |                         |               | Model based*  |               | p-value† |
|-----------------------------------------------------------|-------------------|---------------|-------------------------|---------------|---------------|---------------|----------|
|                                                           | Placebo<br>n = 91 |               | Otelixizumab<br>n = 181 |               | Placebo       | Otelixizumab  |          |
|                                                           | n                 | Estimate (SE) | n                       | Estimate (SE) | Estimate (SE) | Estimate (SE) |          |
| <b>Change from baseline mean daily insulin use, IU/kg</b> | 77                | 0.07 (0.028)  | 167                     | 0.03 (0.018)  | 0.07 (0.023)  | 0.04 (0.016)  | 0.277    |
| <b>Mean daily insulin use, IU/kg</b>                      | 81                | 0.43 (0.026)  | 169                     | 0.39 (0.017)  | 0.42 (0.024)  | 0.39 (0.017)  | 0.276    |
| <b>Change from baseline HbA1c, %</b>                      | 82                | -0.39 (0.174) | 162                     | -0.15 (0.117) | -0.38 (0.140) | -0.20 (0.101) | 0.304    |
| <b>HbA1c, %</b>                                           | 82                | 6.91 (0.147)  | 162                     | 7.04 (0.116)  | 6.83 (0.146)  | 7.02 (0.108)  | 0.289    |
| <b>Change from baseline IDAA1c</b>                        | 86                | -0.07 (0.213) | 176                     | 0.03 (0.157)  | -0.15 (0.197) | -0.02 (0.139) | 0.584    |
| <b>IDAA1c</b>                                             | 90                | 8.58 (0.194)  | 178                     | 8.72 (0.171)  | 8.49 (0.203)  | 8.64 (0.149)  | 0.526    |
| <b>Change from baseline ADRR</b>                          | 59                | 3.41 (1.292)  | 121                     | 4.42 (0.759)  | 3.29 (1.037)  | 4.22 (0.732)  | 0.463    |
| <b>ADRR</b>                                               | 66                | 18.09 (1.263) | 142                     | 19.08 (0.881) | 18.26 (1.075) | 19.02 (0.787) | 0.535    |
| <b>Glycemic excursions‡</b>                               | 78                |               | 161                     |               | -             | -             |          |
| <b>Number</b>                                             |                   | 2.9 (0.41)    |                         | 3.2 (0.32)    |               |               |          |
| <b>Maximum value of excursion, mg/dL</b>                  |                   | 11.2 (1.20)   |                         | 11.0 (0.92)   |               |               |          |

\*Estimates based on model least squares mean. Mixed-effects repeated measures models adjust for age, continent and baseline parameter. †p-value for treatment comparison based on model. Month 12 p-value is unadjusted. ‡≤ 70 mg/dL. ADRR = average daily risk range; IDACC = insulin dose-adjusted HbA1c; ITT = intent to treat.

SUPPLEMENTARY DATA

**Supplementary Table 3.** Adverse events by group in DEFEND

| Event, n (%)                                | Overall                 |                   |
|---------------------------------------------|-------------------------|-------------------|
|                                             | Otelixizumab<br>n = 181 | Placebo<br>n = 91 |
| Headache                                    | 155 (85.6)              | 45 (49.5)         |
| Nausea                                      | 60 (33.1)               | 20 (22.0)         |
| Vomiting                                    | 35 (19.3)               | 13 (14.3)         |
| Pyrexia                                     | 34 (18.8)               | 10 (11.0)         |
| Chills                                      | 24 (13.3)               | 6 (6.6)           |
| Hypoglycemia                                | 23 (12.7)               | 8 (8.8)           |
| Overall number of severe episodes (%)       | 4 (2.2)                 | 2 (2.2)           |
| Overall number of symptomatic episodes (%)  | 163 (90.1)              | 78 (85.7)         |
| Overall number of asymptomatic episodes (%) | 13 (7.2)                | 10 (11.0)         |
| Myalgia                                     | 21 (11.6)               | 14 (15.4)         |
| Arthralgia                                  | 20 (11.0)               | 2 (2.2)           |
| Infections and infestations                 | 2 (1.1)                 | 4 (4.4)           |

\*Severe hypoglycemia: requiring assistance of another person to actively administer carbohydrate, glucagon, or other resuscitative actions; documented symptomatic hypoglycemia: typical symptoms of hypoglycemia accompanied by a measured plasma glucose (PG)  $\leq$ 3.9 mmol/L; asymptomatic hypoglycemia: not accompanied by typical symptoms of hypoglycemia but with a measured PG  $\leq$ 3.9 mmol/L.(19,20)

SUPPLEMENTARY DATA

**Supplementary Figure 1.** Change in CD4+CD25<sup>hi</sup>FoxP3<sup>+</sup> T cells over time in both groups

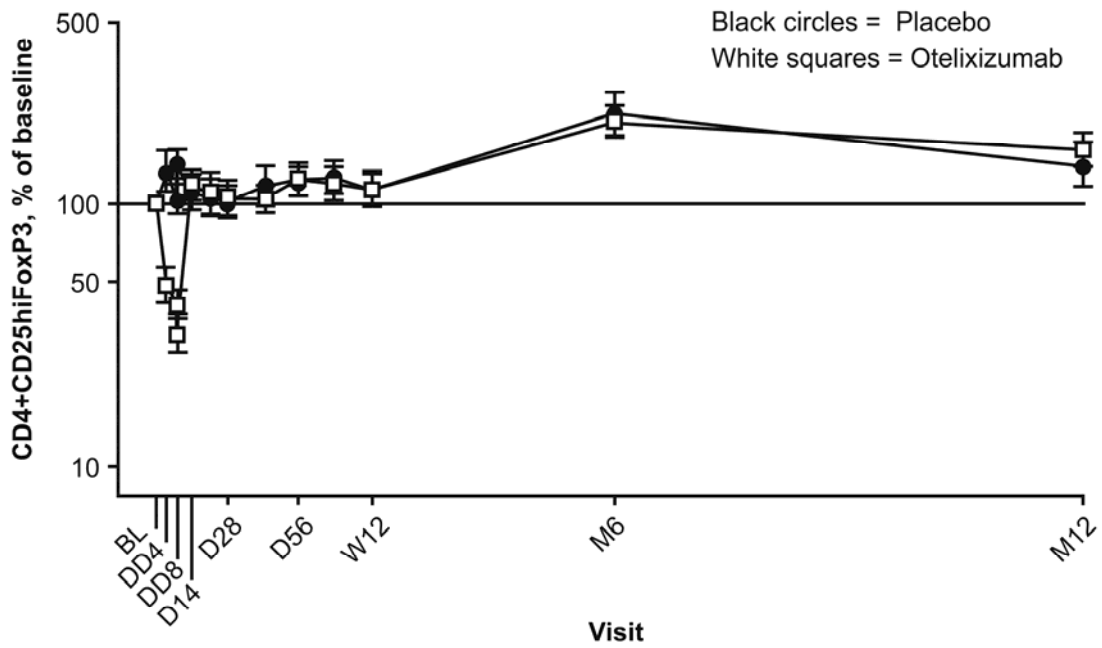

BL = baseline; D = day; DD = dosing day; M = month; W = week
